# Supplementary material
Source: PubMed Central journal article supplement (PMC4808631)
Supplement: NIHMS71550-supplement-01.pdf [file NIHMS71550-supplement-01.pdf]

Supplemental Figure S1.

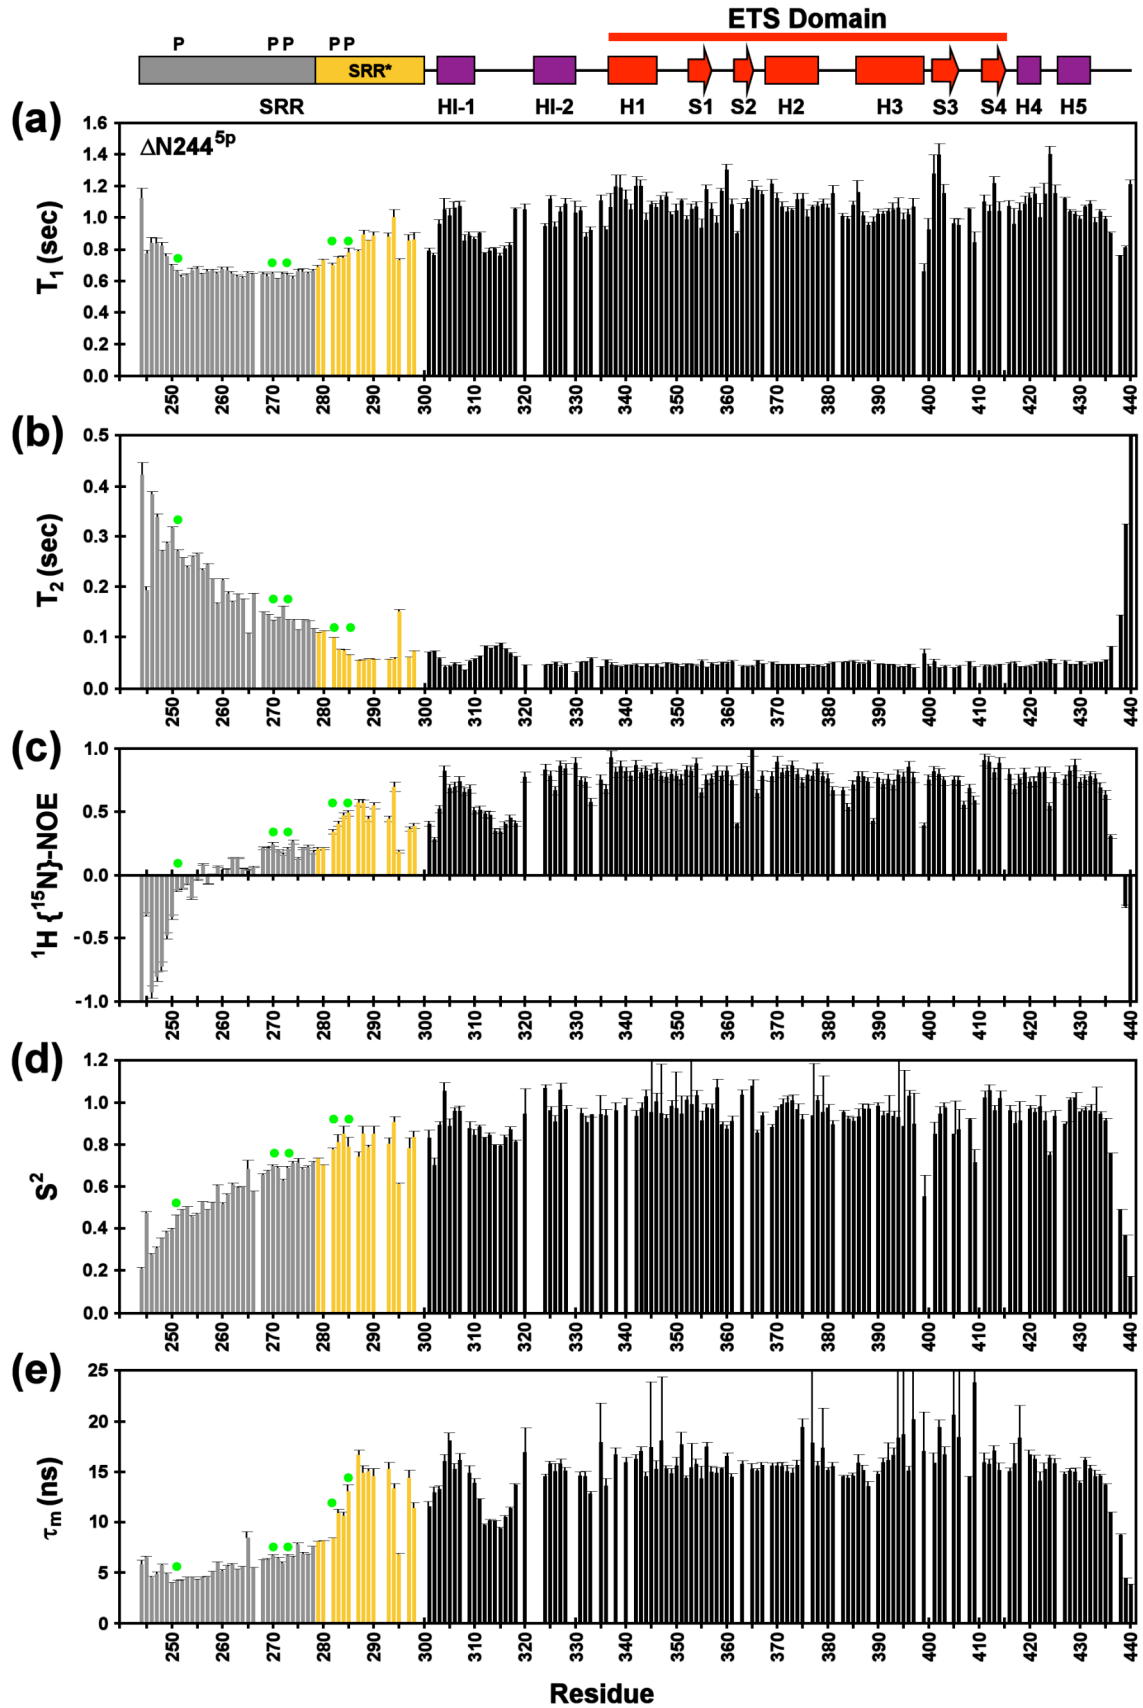

**Supplemental Figure S1.** The backbone dynamics of  $\Delta N244^{5p}$  were characterized by amide  $^{15}\text{N}$  (a)  $T_1$ , (b)  $T_2$ , and (c)  $^1\text{H}\{^{15}\text{N}\}$ -NOE measurements (500 mM NaCl, pH 6.5, 28 °C). Also shown are individually fit per-residue Lipari-Szabo model-free (d) order parameters  $S^2$  and (e) correlation times  $\tau_m$ . The regulatable unit (black) is well ordered with relatively uniform average heteronuclear NOE ( $0.78 \pm 0.10$ ),  $S^2$  ( $0.92 \pm 0.13$ ), and  $\tau_m$  ( $15.2 \pm 2.7$  nsec) values. In contrast, residues 244 to 278 of the SRR (gray) are very flexible on the nsec-psec timescale as evidenced by lower average heteronuclear NOE ( $-0.08 \pm 0.22$ ),  $S^2$  ( $0.55 \pm 0.11$ ), and effective  $\tau_m$  ( $5.7 \pm 1.1$  nsec) values. Residues 279 to 300 of the SRR (yellow) are also flexible, but show more restricted motion on this fast timescale (average NOE =  $0.42 \pm 0.15$ ;  $S^2 = 0.79 \pm 0.07$ ;  $\tau_m = 12.1 \pm 3.2$  nsec). Based upon this clear break in the relaxation properties of the SRR, we have focused on a deletion fragment,  $\Delta N279$ , containing residues 279-300 (denoted SRR\*). Similar relaxation profiles were observed for  $\Delta N279$  and  $\Delta N279^{2p}$  (Fig. 5a,b), albeit with slightly more mobility for corresponding residues in the SRR\* relative to those in  $\Delta N244^{5p}$ . This is consistent with a correlation of reduced dynamics and increased autoinhibition, as phosphorylation of  $\Delta N244$  at 5 serines dampens the flexibility of the SRR. The phosphoserines are indicated by green dots, and missing data points correspond to proline or residues with unassigned, overlapping, or weak NMR signals. A secondary structure schematic is shown above the graphs.

## Supplemental Figure S2.

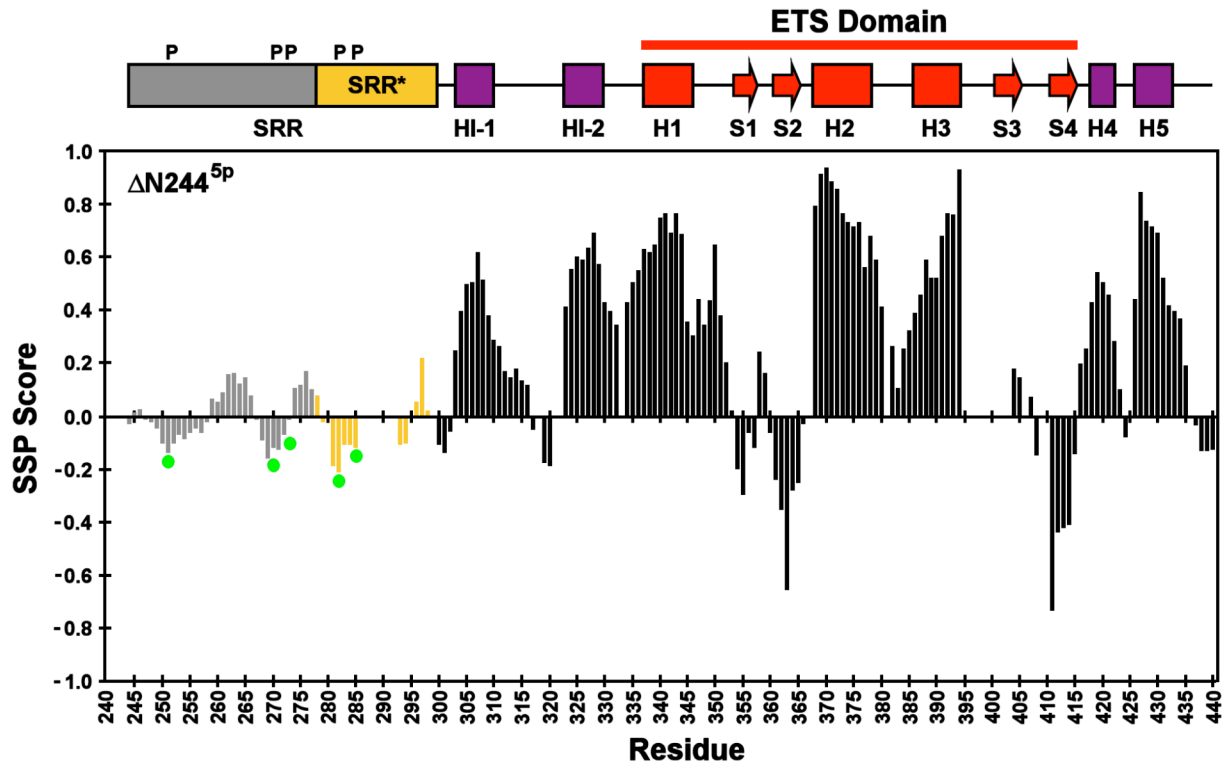

**Supplemental Figure S2.** The SRR of  $\Delta N244^{5p}$  lacks any predominant secondary structure. Shown are secondary structural propensity (SSP) scores derived from available main chain  $^1\text{H}$ ,  $^{13}\text{C}$ , and  $^{15}\text{N}$  chemical shifts (using correction values derived from random coil phosphoserine chemical shifts<sup>25</sup>). Values approaching +1 and -1 are indicative of well defined  $\alpha$ -helices and  $\beta$ -strands, respectively<sup>24</sup>. The SRR\* is highlighted in yellow and phosphoserines are indicated by green dots. Missing data points correspond to prolines or residues with unassigned NMR signals.

Supplemental Figure S3.

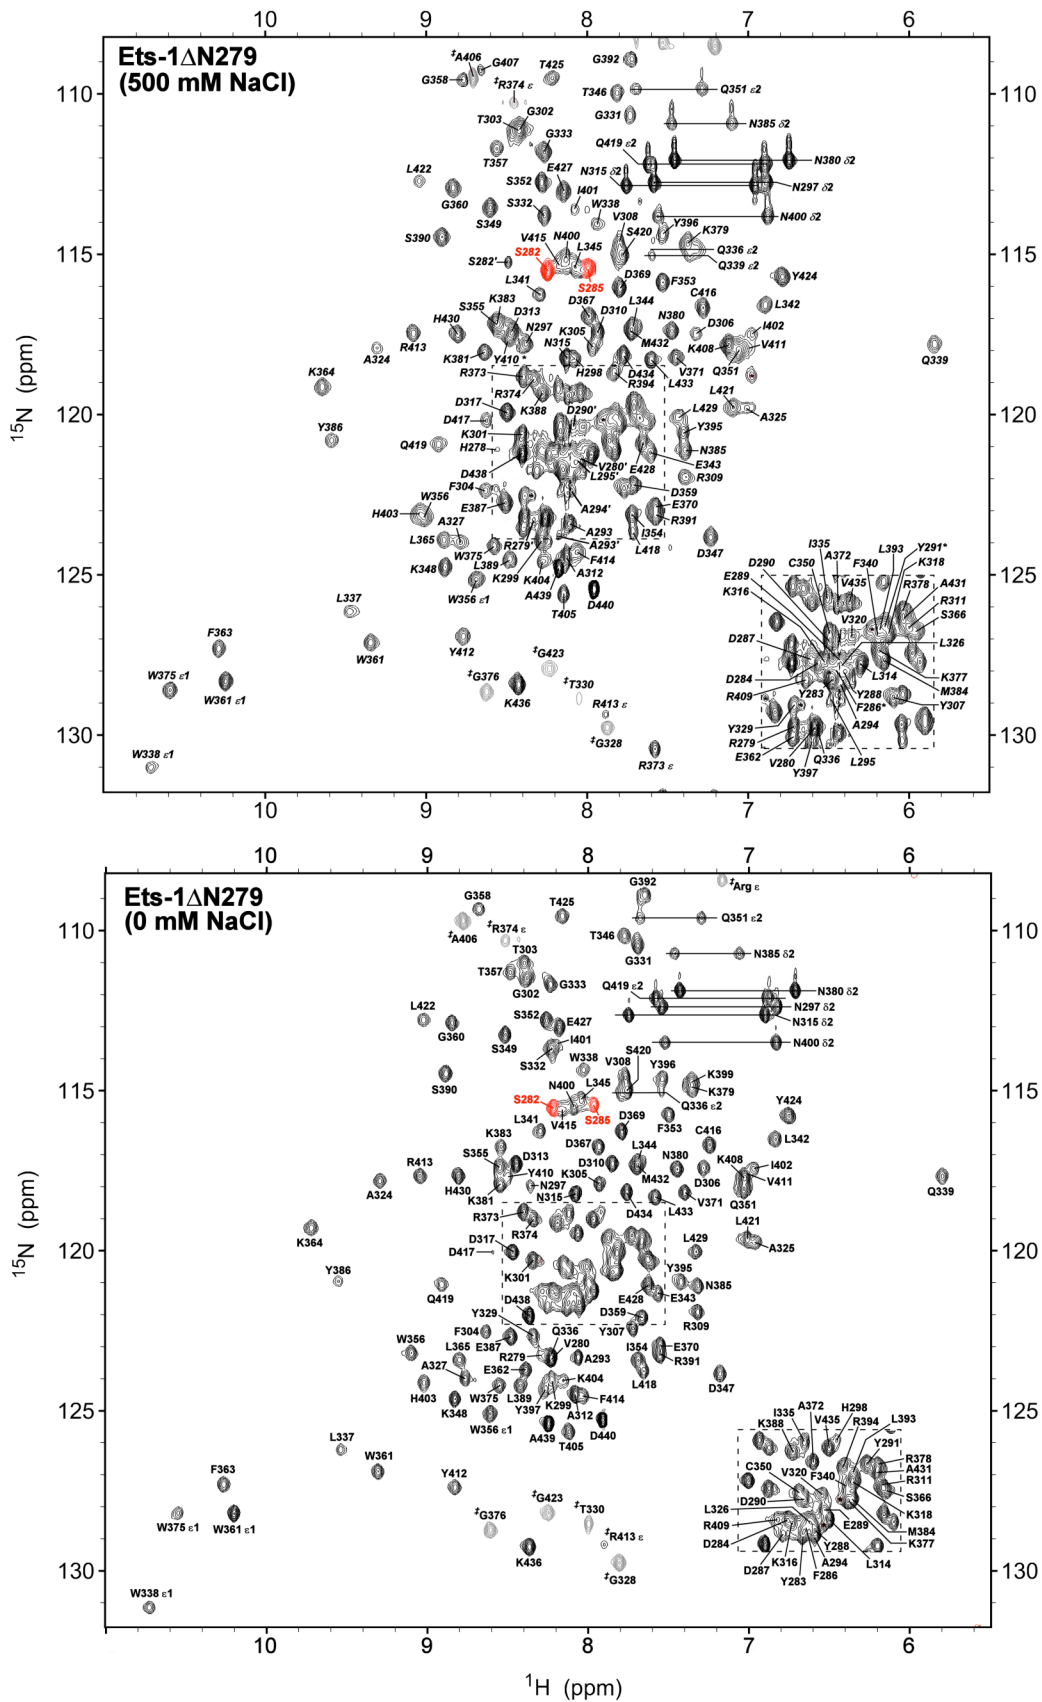

**Supplemental Figure S3.** The  $^1\text{H}$ - $^{15}\text{N}$  HSQC of  $\Delta\text{N279}$ , acquired at 600 MHz and 28 °C in 20 mM phosphate (pH 6.5), 0.02%  $\text{NaN}_3$ , 5 mM dithiothreitol, 10%  $\text{D}_2\text{O}$  and either 500 mM NaCl (top panel) or 0 mM NaCl (bottom panel). Unassigned and tentatively assigned peaks are indicated by asterisks, while peaks folded in the  $^{15}\text{N}$ -dimension are denoted by double daggers ( $\ddagger$ ). Peaks of residues in minor conformations are indicated by primes ( $'$ ). The insets at the lower right of each panel correspond to the crowded region at the center of the spectrum. The signals of S282 and S285 are indicated in red.

Supplemental Figure S4.

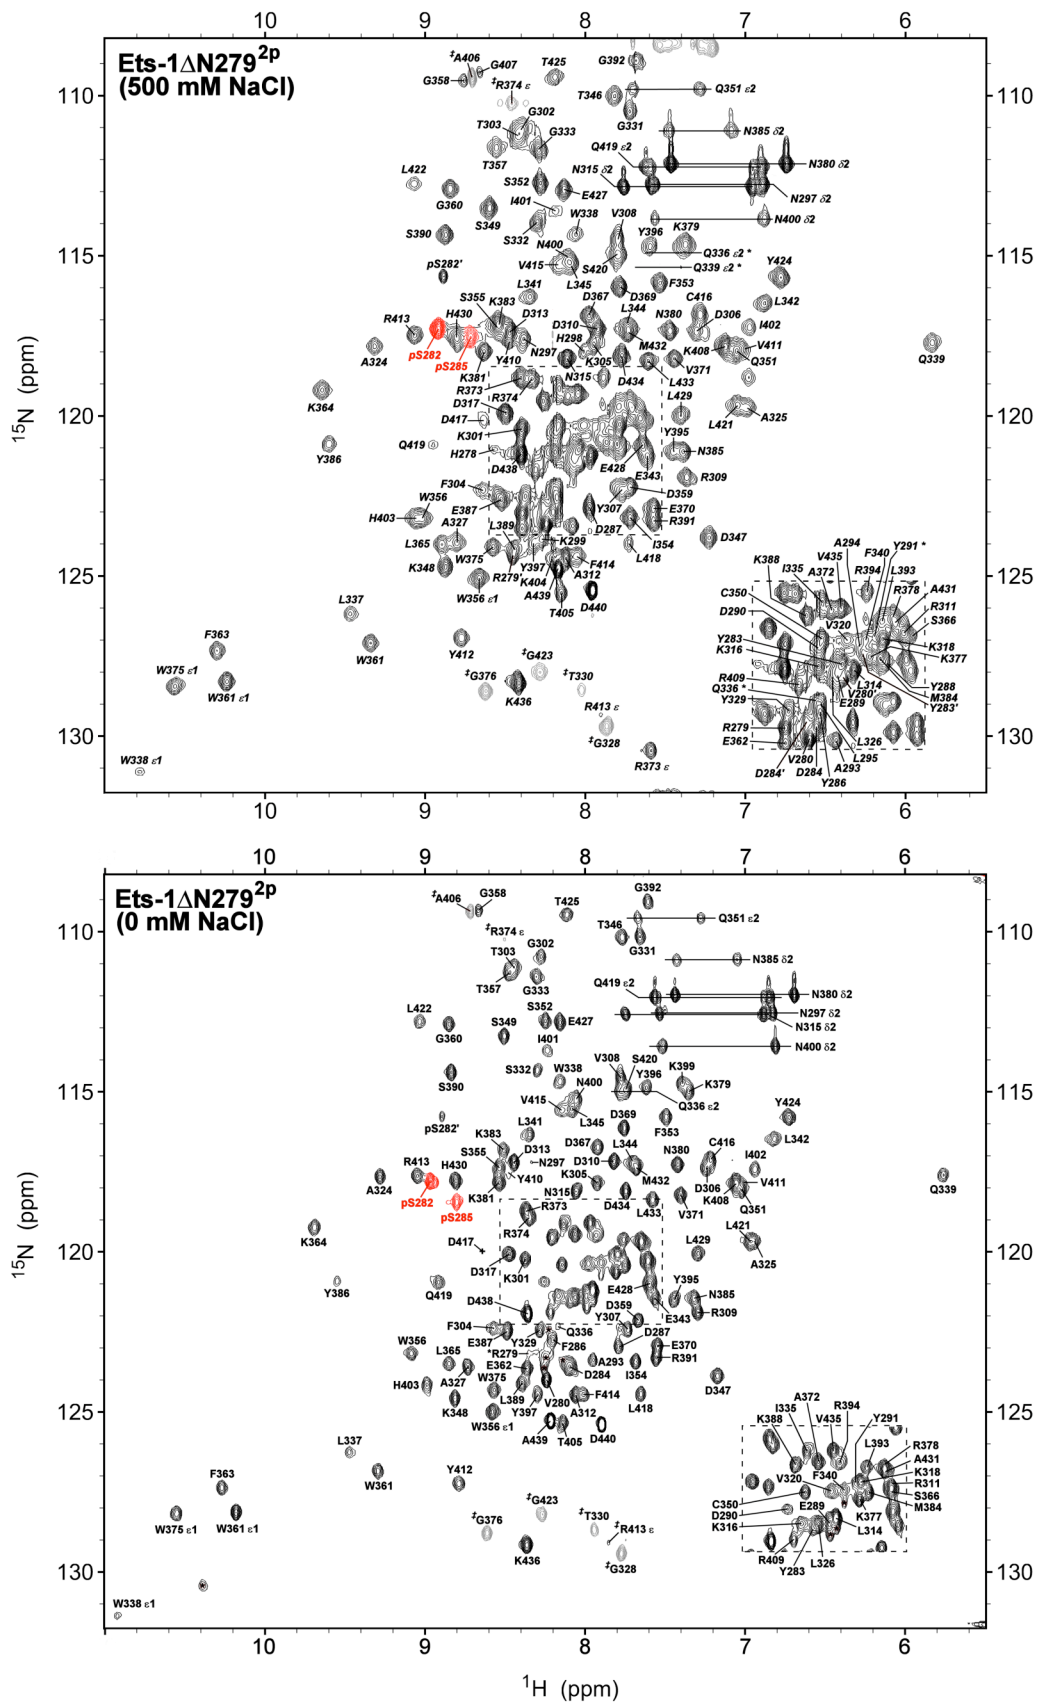

**Supplemental Figure S4.** The  $^1\text{H}$ - $^{15}\text{N}$  HSQC of  $\Delta\text{N279}^{2\text{p}}$ , acquired at 600 MHz and 28 °C in 20 mM phosphate (pH 6.5), 0.02%  $\text{NaN}_3$ , 5 mM dithiothreitol, 10%  $\text{D}_2\text{O}$  and either 500 mM NaCl (top panel) or 0 mM NaCl (bottom panel). Unassigned and tentatively assigned peaks are indicated by asterisks, while peaks folded in the  $^{15}\text{N}$ -dimension are denoted by double daggers ( $\ddagger$ ). Peaks of residues in minor conformations are indicated by primes ( $'$ ). The insets at the lower right of each panel correspond to the crowded region at the center of the spectrum. The signals of phosphorylated serines pS282 and pS285 are indicated in red.

### Supplemental Figure S5.

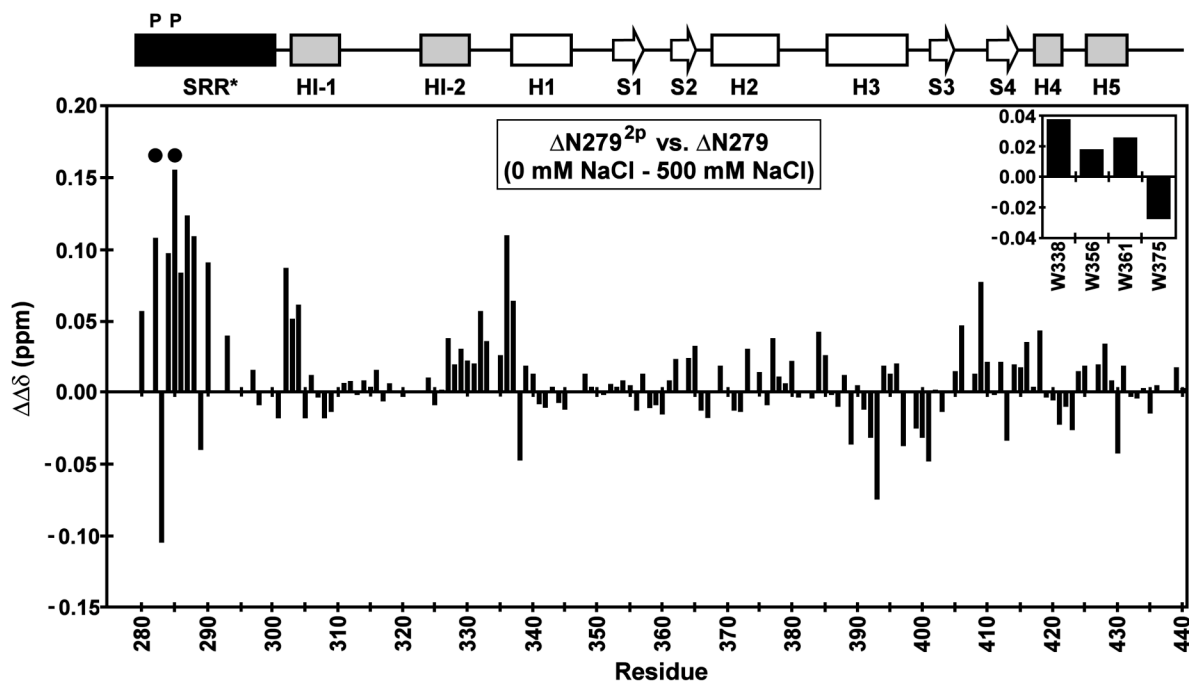

**Supplemental Figure S5.** A difference  $^1\text{H}^{\text{N}}$  and  $^{15}\text{N}$  chemical shift perturbation ( $\Delta\Delta\delta$ ) plot for corresponding amides in  $\Delta\text{N}279^{2\text{P}}$  versus  $\Delta\text{N}279$  in 0 mM versus 500 mM NaCl. The data are the differences between the red and black histogram bars of Figure 6b. Increasing ionic strength partially reduces the phosphorylation-dependent chemical shift perturbations of  $\Delta\text{N}279$ . However, even at 500 mM NaCl, the  $^1\text{H}$ - $^{15}\text{N}$  HSQC spectrum of  $\Delta\text{N}279$  is altered upon phosphorylation (see Fig. 6a,b). This suggests that electrostatic interactions are not dominant in phosphorylation-dependent stabilization of the regulatable unit, and by inference, in DNA binding autoinhibition. The absence of a bar indicates that the  $\Delta\Delta\delta$  could not be unambiguously measured for a given residue due to spectral overlap or weak signals in at least one species or condition, and dark circles represent the phosphoacceptor serines.
